# Supplementary material
Source: PubMed Central journal article supplement (PMC5587378)

**Supplementary Table S1. Genotypes of indicated genes and 17-AAG IC<sub>50</sub> in 6 CRC cell lines**

| <b>Cell line</b> | <b><i>KRAS</i></b> | <b><i>BRAF</i></b> | <b><i>PIK3CA</i></b> | <b><i>p53</i></b> | <b><i>FBW7</i></b> | <b>17-AAG IC<sub>50</sub></b> |
|------------------|--------------------|--------------------|----------------------|-------------------|--------------------|-------------------------------|
| <b>HCT116</b>    | p.G13D             | WT                 | p.H1047R             | WT                | WT                 | 0.31                          |
| <b>Lim2405</b>   | WT                 | p.V600E            | WT                   | WT                | WT                 | 0.46                          |
| <b>RKO</b>       | WT                 | p.V600E            | p.H1047R             | WT                | WT                 | 0.30                          |
| <b>SW48</b>      | WT                 | WT                 | p.G914R              | WT                | p.R658Q            | 1.35                          |
| <b>LOVO</b>      | p.G13D             | WT                 | WT                   | WT                | p.R505C            | 1.28                          |
| <b>HCT-8</b>     | p.G13D             | WT                 | p.E545K              | WT                | p.R658Q            | 3.07                          |

## Supplementary figure legend

**Supplementary Fig. S1. Induction of proapoptotic Bcl-2 family proteins by 17-AAG in *FBW7*-mutant CRC cells.** Western blotting of indicated proapoptotic Bcl-2 family proteins in *FBW7*-mutant SW48 and LoVo cells treated with 1  $\mu$ M 17-AAG at indicated time points.

**Supplementary Fig. S2. *FBW7* is critical for cell death and Mcl-1 degradation induced by Hsp90 inhibitors in CRC cells.** (A) WT and *FBW7*-KO DLD1 cells treated with 1  $\mu$ M 17-AAG for 48 hr were analyzed for apoptosis by counting condensed and fragmented nuclei. (B) Western blotting of Mcl-1 in WT and *FBW7*-KO DLD1 cells treated with 1  $\mu$ M 17-AAG or 0.25  $\mu$ M 17-DMAG at indicated time points. (C) 17-AAG sensitivity of WT and *FBW7*-KO DLD1 cells with or without HA-tagged *FBW7* transient transfection or *Mcl-1* knockdown, which was analyzed by western blotting (left panel). (D) Western blotting of transiently transfected HA-tagged R505C mutant *FBW7* in the presence or absence of transfected Flag-tagged WT *FBW7* in SW48 cells. (E) 17-AAG sensitivity of *FBW7*-mutant SW48 cells with transient transfection of HA-tagged WT *FBW7* or R505C mutant, which was analyzed by western blotting (left panel). (F) 17-AAG sensitivity of *FBW7*-KO DLD1 cells transiently transfected with HA-tagged WT *FBW7* or indicated mutants (R465C, R479Q or R505C). Transfected *FBW7* was analyzed by western blotting (left panel). In (B)-(F), western blotting was performed on untreated cells at 24 hr after transfection. In (C), (E) and (F), 17-AAG sensitivity was analyzed by MTS assay on cells treated with 17-AAG at indicated concentrations for 72 hr. Results in (A), (C), (E) and (F) were expressed as means  $\pm$  s.d. of three independent experiments.

**Supplementary Fig. S3. Mcl-1 degradation induced by Hsp90 inhibitors.** (A) Western blotting of Mcl-1 in HCT116 cells treated with 0.25  $\mu$ M 17-DMAG at indicated time points. (B) Western blotting of Mcl-1 in HCT116 cells treated with 17-AAG or 17-DMAG at indicated concentrations

for 24 hr. **(C)** *Mcl-1* mRNA expression in HCT116 cells treated with 1  $\mu$ M 17-AAG at the indicated time points was analyzed by RT-PCR followed by gel electrophoresis (upper panel), or by real-time RT-PCR (lower panel).  *$\beta$ -Actin* was used as a control for normalization. Results were expressed as means  $\pm$  s.d. of three independent experiments. **(D)** Western blotting of indicated proteins in HCT116 cells transfected with control or *GSK3 $\beta$*  siRNA, and then treated with 1  $\mu$ M 17-AAG for 48 hr.

**Supplementary Fig. S4. Analysis of non-apoptotic death pathways in *Mcl-1*-KI cells treated with 5-fluorouracil.** **(A)** WT and *Mcl-1*-KI HCT116 cells with or without 1-hr pretreatment with the necroptosis inhibitor necrosulfonamide (NSA; 5  $\mu$ M) were treated with 5-fluorouracil (5-FU; 50  $\mu$ g/ml) for 48 hr. Non-apoptotic cell death was analyzed by quantification of propidium iodide (PI) positive and annexin V negative cells by flow cytometry. Results were expressed as means  $\pm$  s.d. of three independent experiments. **(B)** WT and *Mcl-1*-KI HCT116 cells treated with 5-FU (50  $\mu$ g/ml) for 48 hr were analyzed for autophagy by western blotting of LC3II accumulation and p62 degradation.

Supplementary Fig. S1

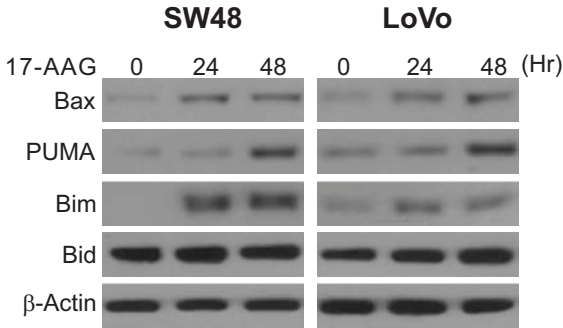

# Supplementary Fig. S2

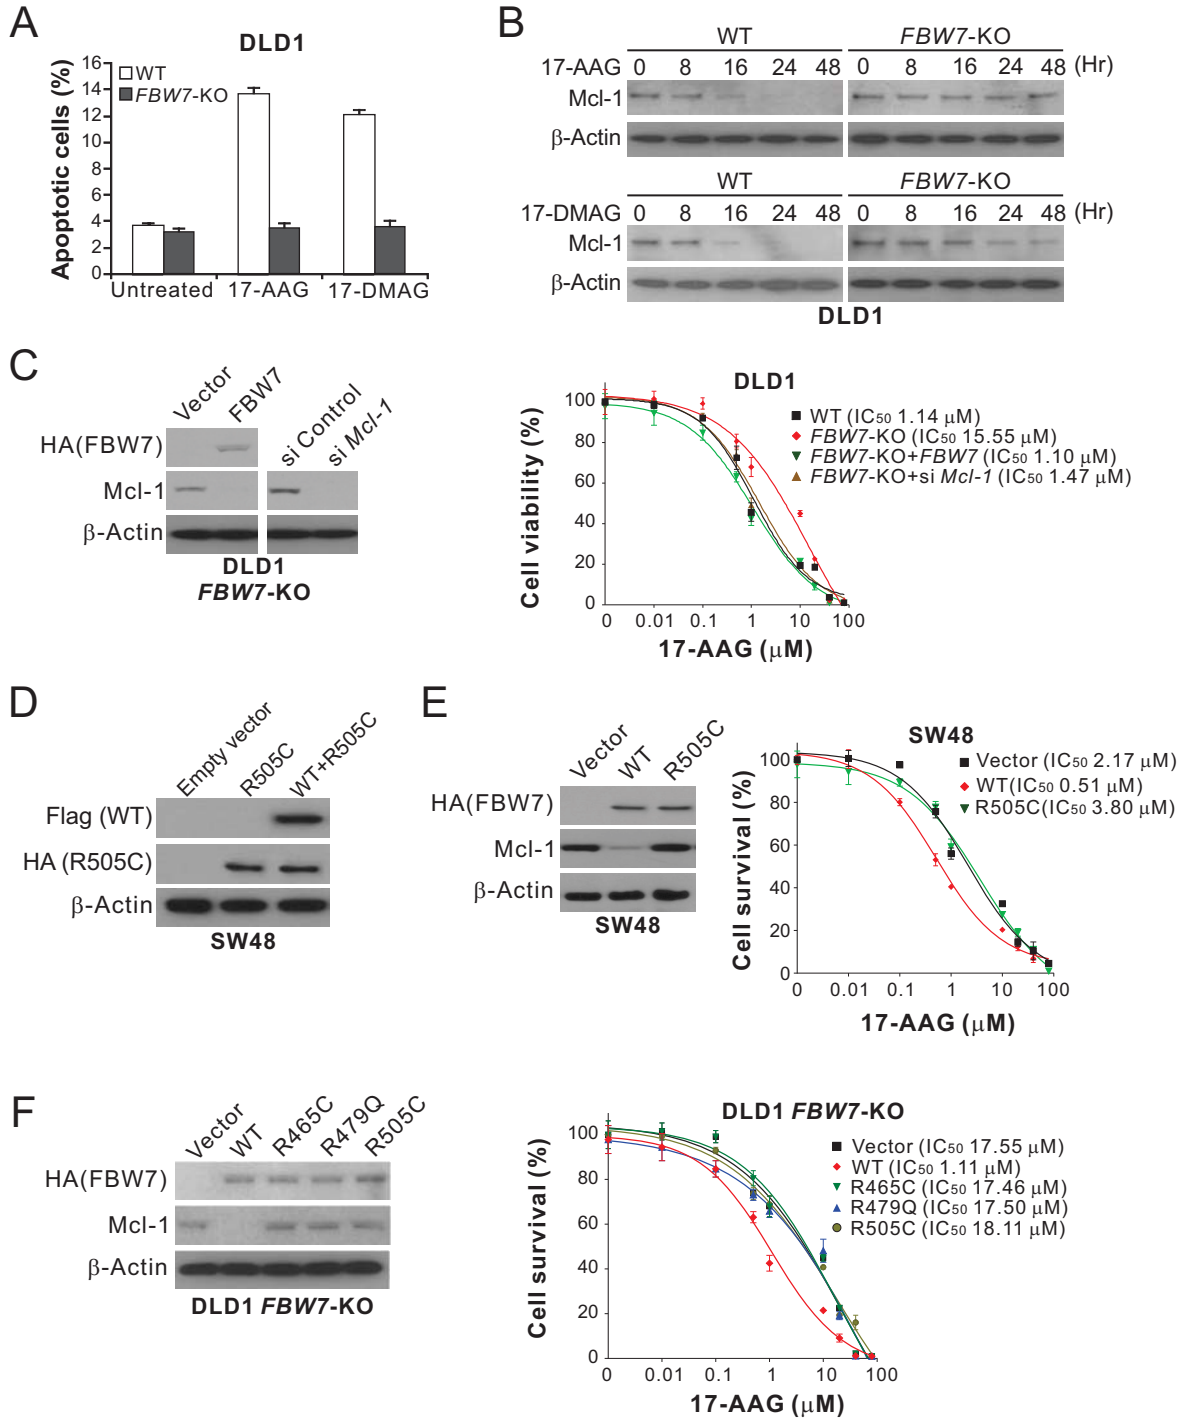

# Supplementary Fig. S3

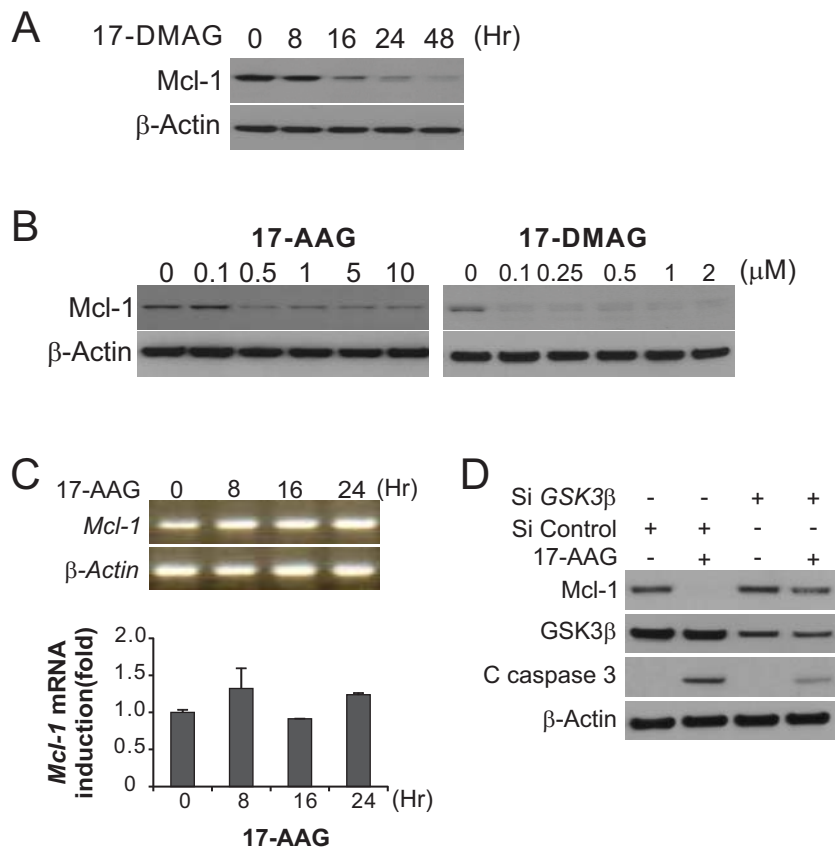

# Supplementary Fig. S4

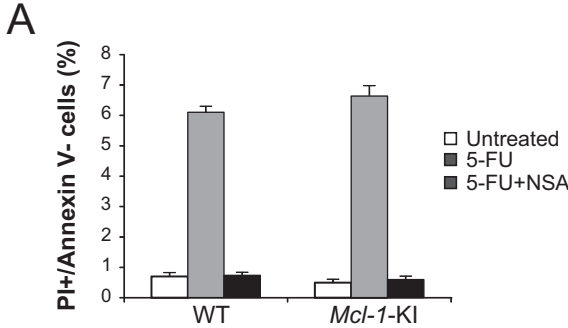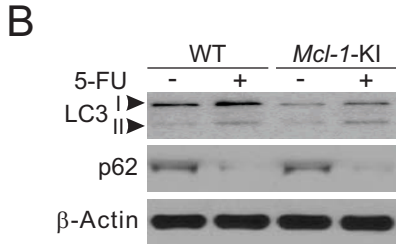

Supplement: NIHMS884444-supplement-1.pdf [file NIHMS884444-supplement-1.pdf]
